# Supplementary material for: Modulation of de Novo Lipogenesis Improves Response to Enzalutamide Treatment in Prostate Cancer
Source: PubMed Central journal article supplement (PMC7698241; doi:10.3390/cancers12113339), 2020-11-11
Supplement: cancers-12-03339-s001.pdf [file cancers-12-03339-s001.pdf]

Supplementary Materials:

## Modulation of de novo Lipogenesis Improves Response to Enzalutamide Treatment in Prostate Cancer

Mohamed Amine Lounis, Benjamin Péant, Kim Leclerc-Desaulniers, Dwaipayan Ganguli, Caroline Daneault, Matthieu Ruiz, Amina Zoubeidi, Anne-Marie Mes-Masson and Fred Saad

Table S1. List of primary antibodies.

| Name           | Cat Number | Isotype    | Company        | Dilution |
|----------------|------------|------------|----------------|----------|
| SCD1           | Ab39969    | Rabbit IgG | Abcam          | 1:1000   |
| PERK           | #5683      | Rabbit IgG | Cell signaling | 1:1000   |
| CHOP           | #2895      | Mouse IgG  | Cell signaling | 1:1000   |
| IRE $\alpha$   | #3294      | Rabbit IgG | Cell signaling | 1:1000   |
| Cleaved PARP   | #5625      | Rabbit IgG | Cell signaling | 1:1000   |
| pPDK1 (ser241) | #3438      | Rabbit IgG | Cell signaling | 1:1000   |
| PDK1 (D4Q4D)   | #13037     | Rabbit IgG | Cell signaling | 1:1000   |
| pAKT (ser473)  | #4060      | Rabbit IgG | Cell signaling | 1:1000   |
| AKT            | #3685      | Rabbit IgG | Cell signaling | 1:1000   |
| $\beta$ -ACTIN | ab8226     | Mouse IgG  | Abcam          | 1:5000   |

Table S2. List of primers.

| Name           | Forward Sequence              | Reverse Sequence              |
|----------------|-------------------------------|-------------------------------|
| SREBF1         | 5'-GCCCTGTAAACGACCACTG-3'     | 5'-CAGCGAGTCTGCCTTGATG-3'     |
| ACC            | 5'-ATGTCTGGCTTGACCTAGTA-3'    | 5'-CCCCAAAGCGAGTAACAAATTCT-3' |
| FASN           | 5'-AAGGACCTGTCTAGGTTTGATGC-3' | 5'-TGGCTTCATAGGTGACTTCCA-3'   |
| SCD            | 5'-TCTAGCTCCTATACCACCACCA-3'  | 5'-TCGTCTCCAACCTATCTCCTCC-3'  |
| ELVOL6         | 5'-AACGAGCAAAGTTTGAAGTGG-3'   | 5'-TCGAAGAGCACCGAATATACTGA-3' |
| ATF4           | 5'-ATGACCGAAATGAGCTTCCTG-3'   | 5'-GCTGGAGAACCCATGAGG-3'      |
| ATF3           | 5'-CCTCTGCGCTGGAATCAGTC-3'    | 5'-TCTTTCTCGTCGCCTCTTTT-3'    |
| GRP78          | 5'-CATCACGCCCTCCTATGTCG-3'    | 5'-CGTCAAAGACCGTGTCTCG-3'     |
| XBP1           | 5'-CCCTCCAGAACATCTCCCAT-3'    | 5'-ACATGACTGGGTCCAAGTTGT-3'   |
| CHOP           | 5'-GGAAACAGAGTGGTCATTCCC-3'   | 5'-CTGCTTGAGCCGTTCACTTC-3'    |
| $\beta$ -Actin | 5'-CATGTACGTTGCTATCCAGGC-3'   | 5'-CTCCTTAATGTCACGCACGAT-3'   |

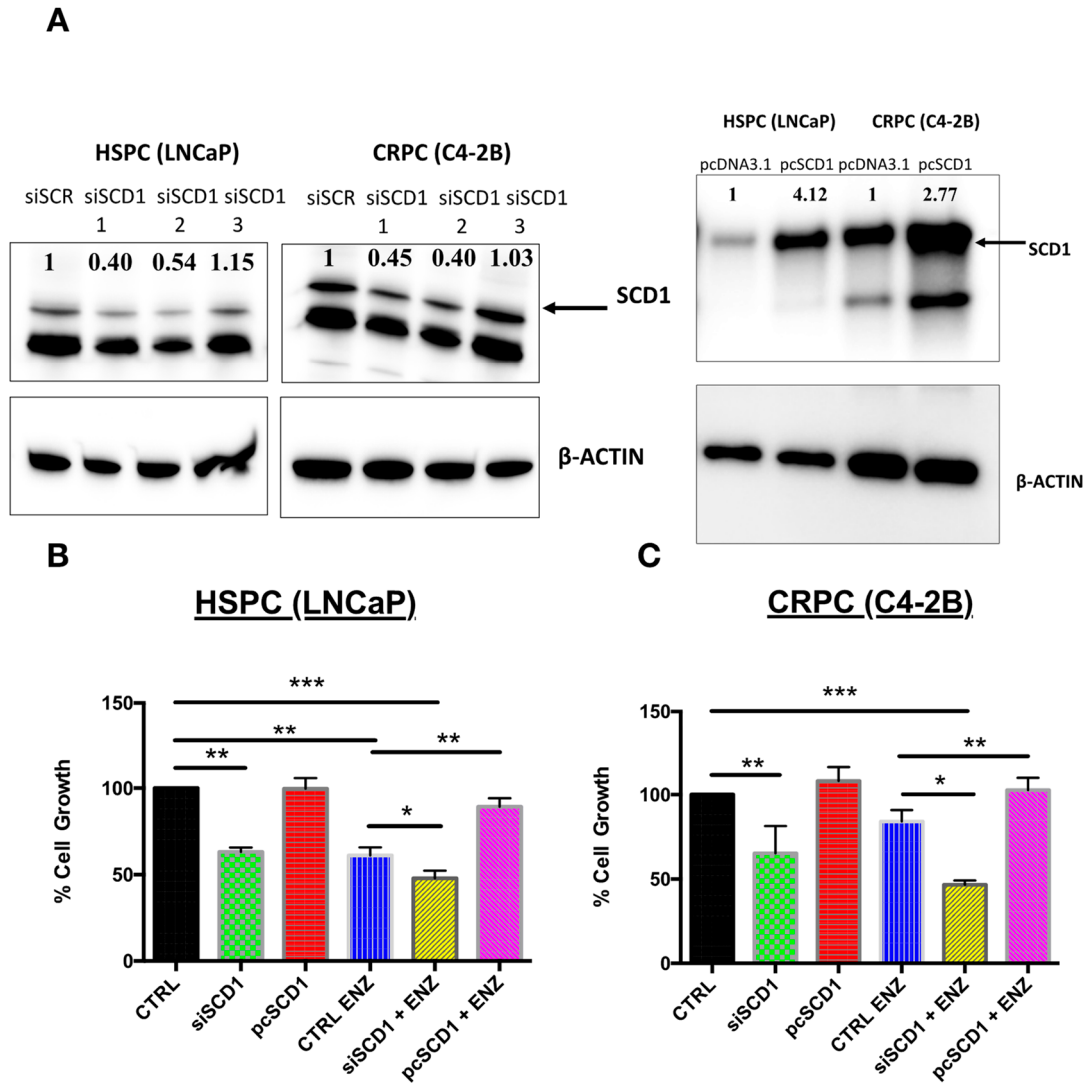

**Figure S1.** Inhibition of SCD1 using siRNA in combination with ENZ affects significantly the proliferation of PC cells. (A) Western blot analyses of SCD1 protein from HSPC (LNCaP) and CRPC (C4-2B) cells transfected with SCD1 siRNAs (siSCD1), siSramble, (Left panel) and with pcDNA SCD1 (pcSCD1) or pcDNA vector (Right panel). Proliferation of LNCaP (B) and C4-2B (C) cells transfected with SCD1 (siSCD1), siSramble, pcDNA SCD1 (pcSCD1) or pcDNA vector in absence or in presence of 10  $\mu$ M ENZ after 3 days of treatment. Data represent the mean  $\pm$  SD of three independent experiments. Data were analyzed using the one-way ANOVA test. \*  $p < 0.05$ , \*\*  $p < 0.01$ , and \*\*\*  $p < 0.001$ .

Figure 2D

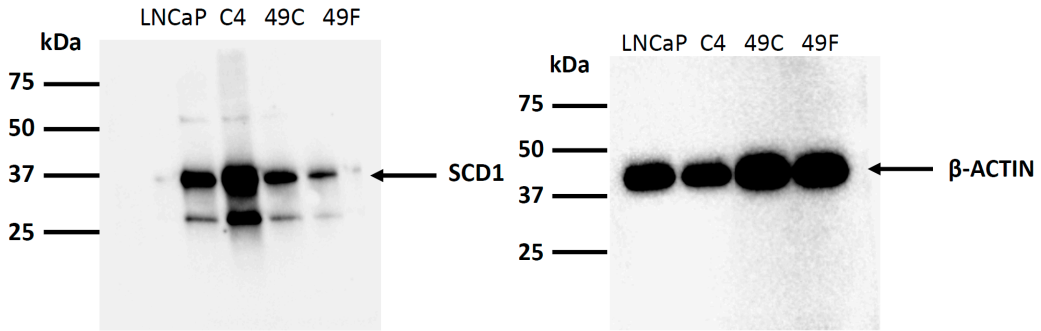

Figure 3D

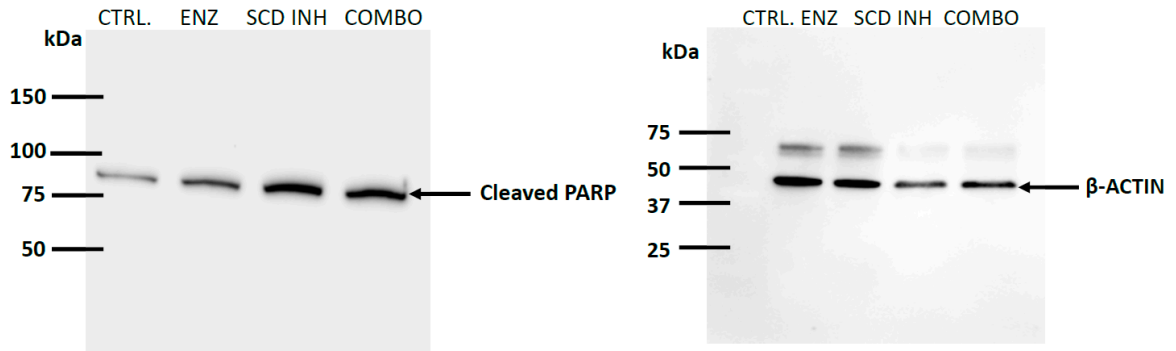

Figure 3E

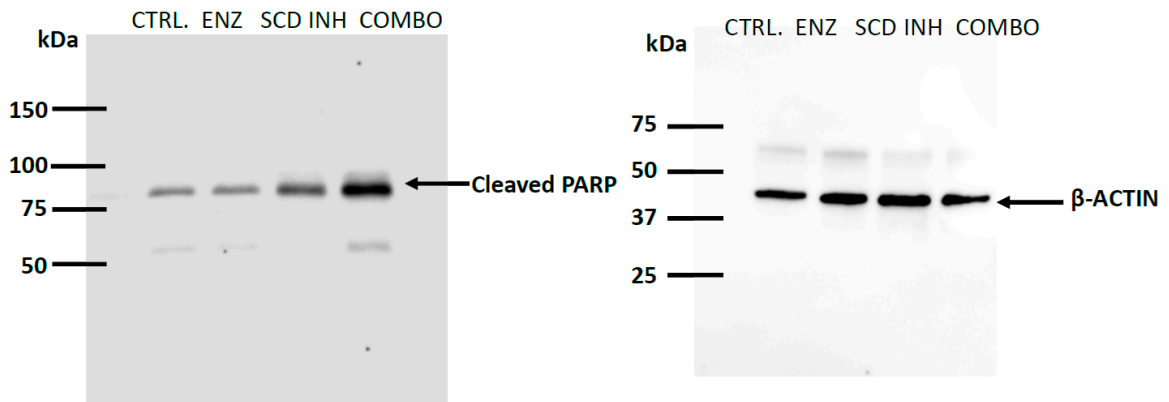

Figure S1

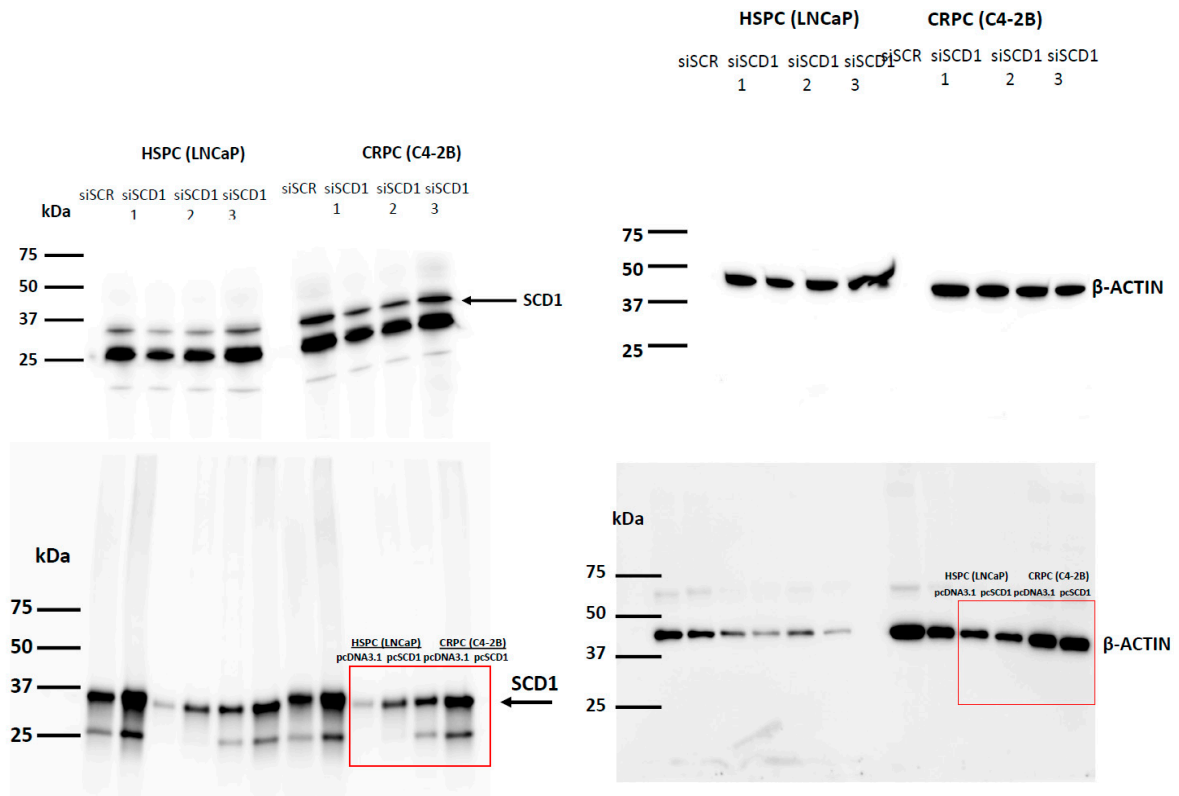

Figure 4A

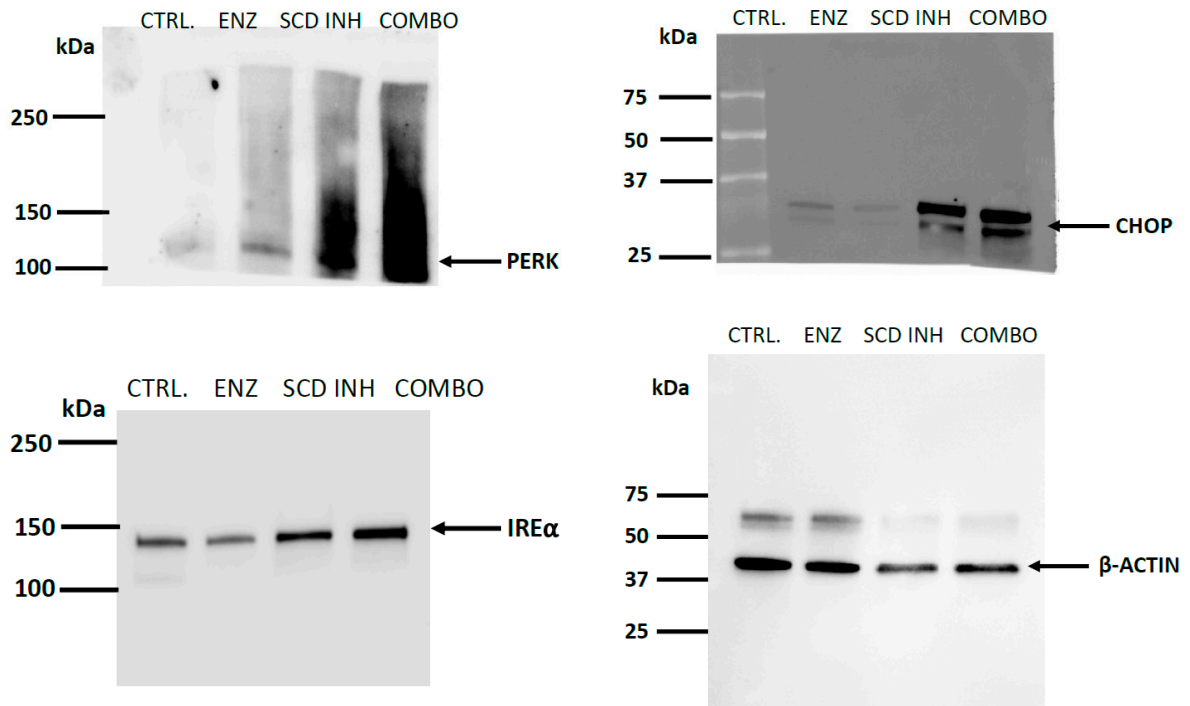

Figure 4B

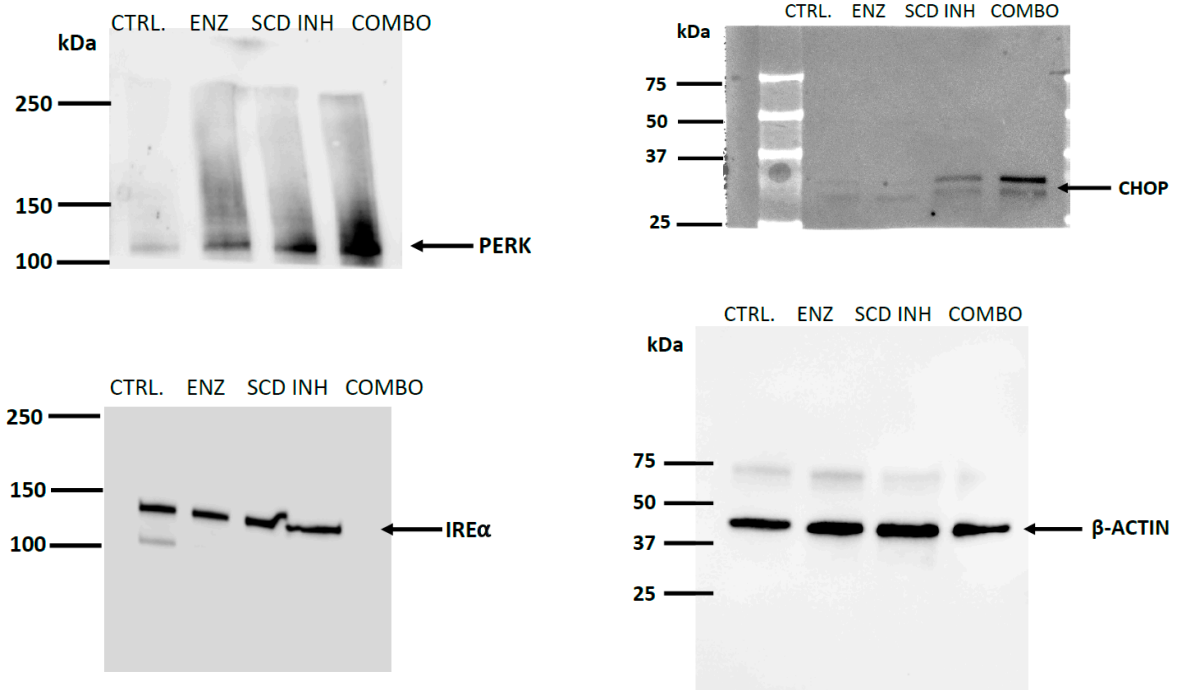

Figure 5A-B

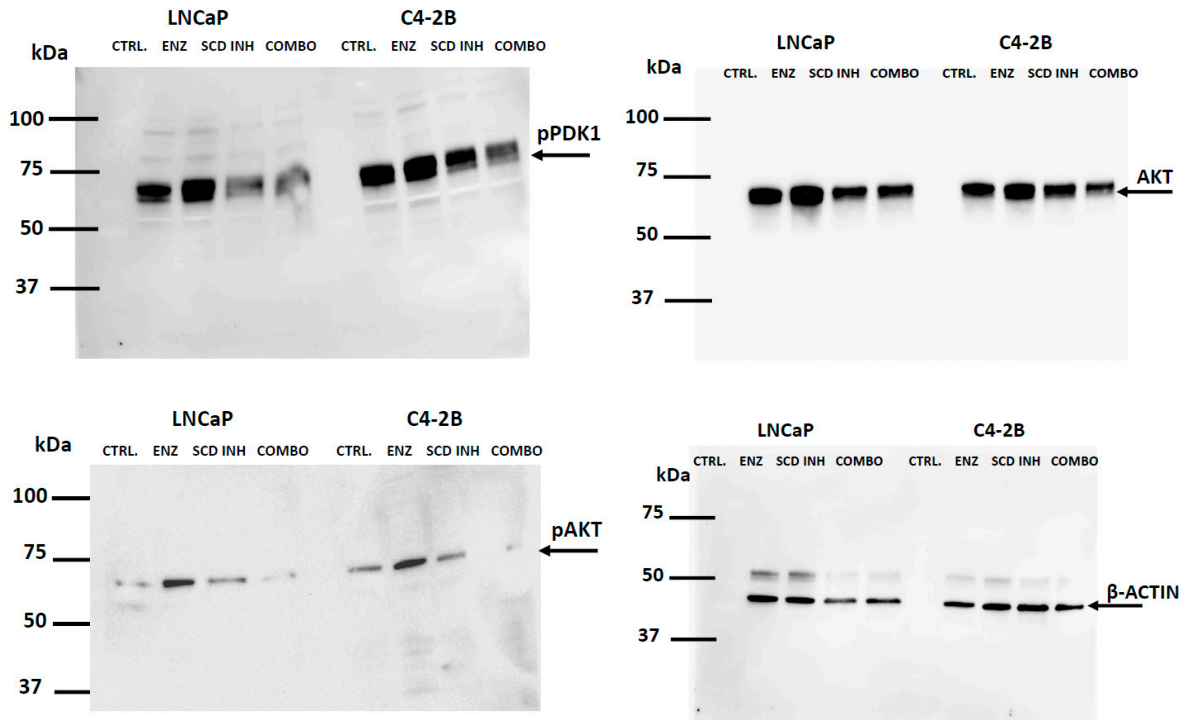

Figure 5C

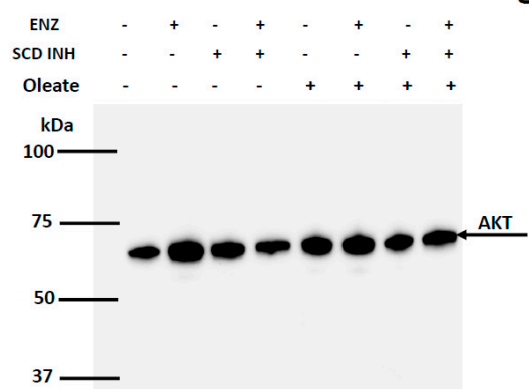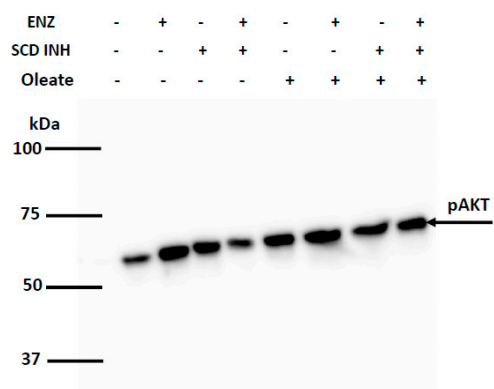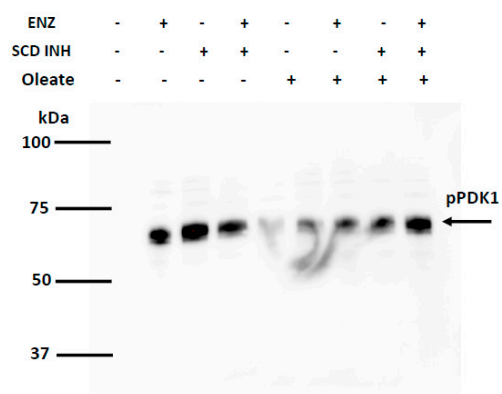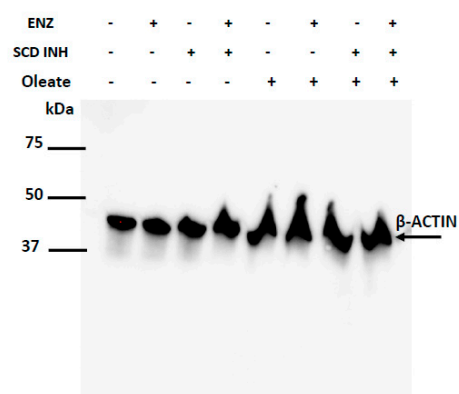

Figure 5D

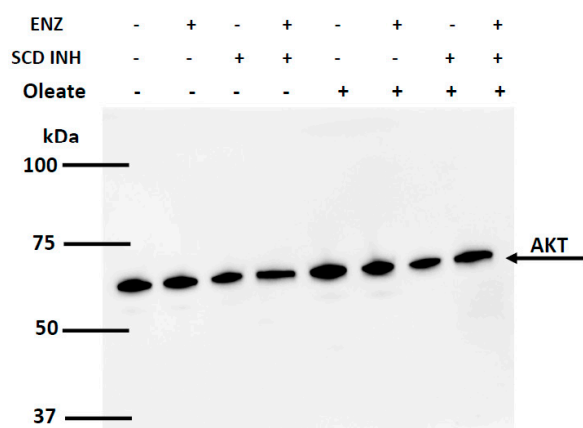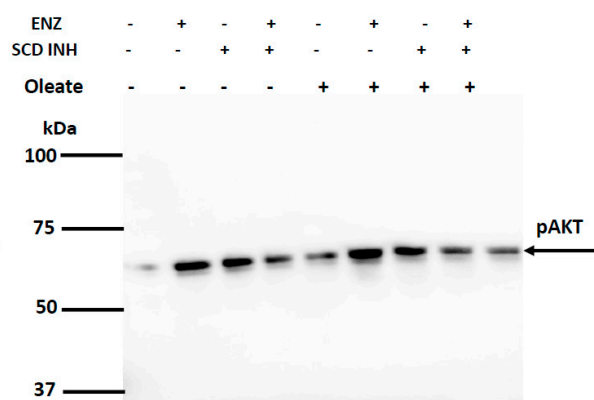

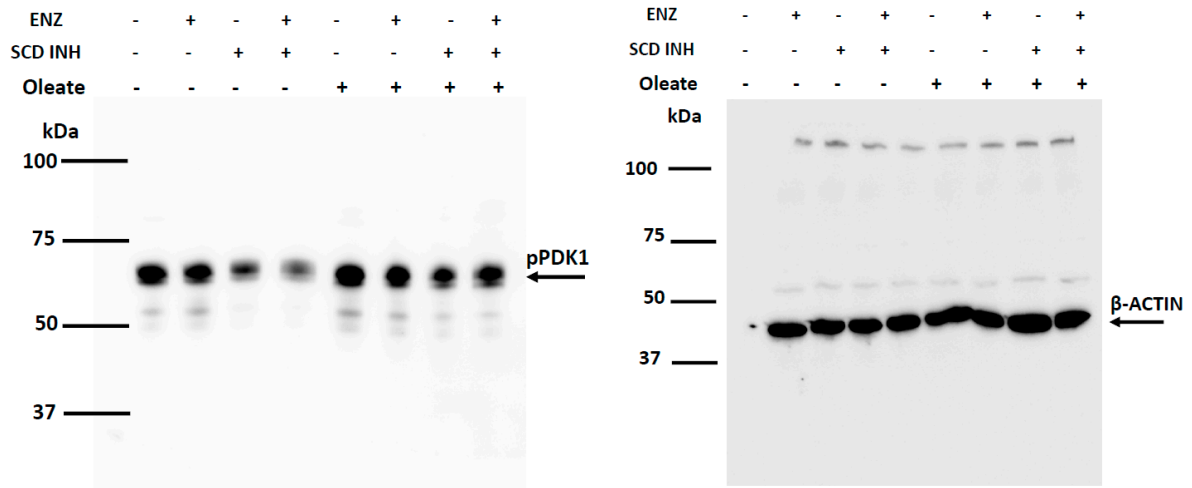

Figure 6C

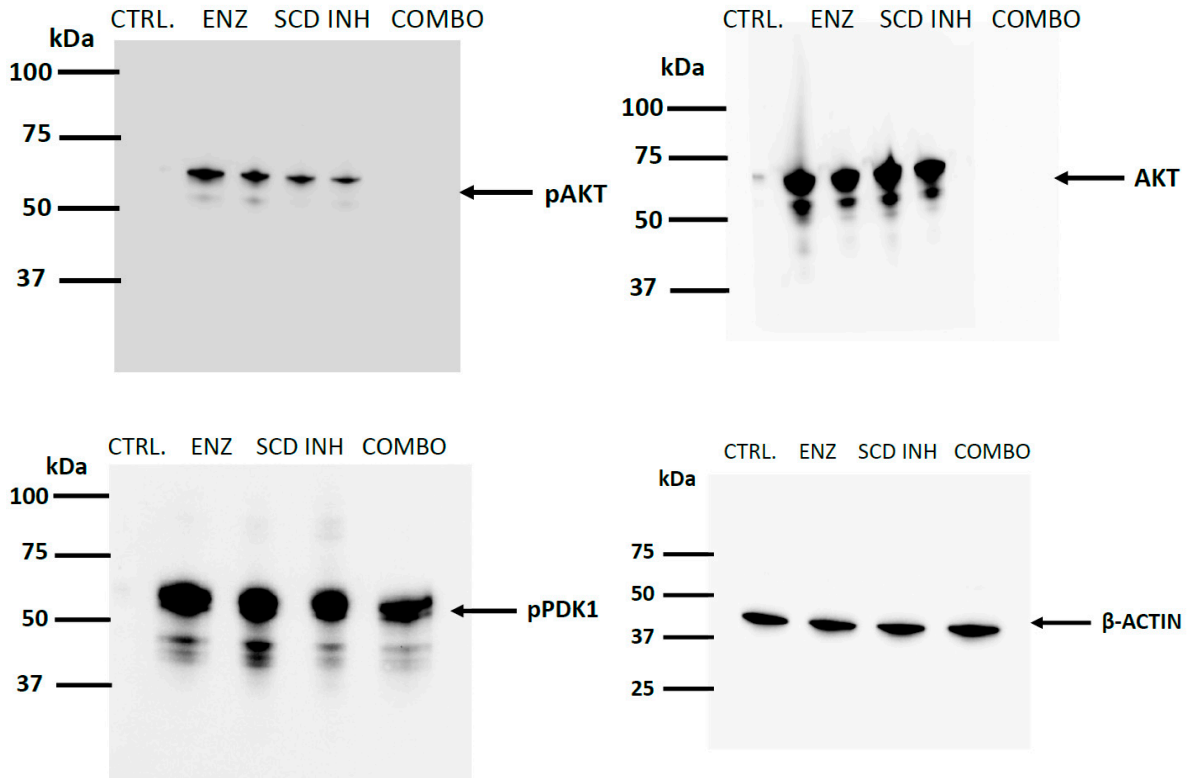

Figure S2. The whole blots.

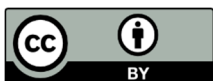

© 2020 by the authors. Licensee MDPI, Basel, Switzerland. This article is an open access article distributed under the terms and conditions of the Creative Commons Attribution (CC BY) license (<http://creativecommons.org/licenses/by/4.0/>).
